# Supplementary material
Source: Springer Nature journal article supplement (https://www.springermedizin.de/resource/supplementary/12879_2011_1729_MOESM1_ESM.pdf/9443910)

Patient number

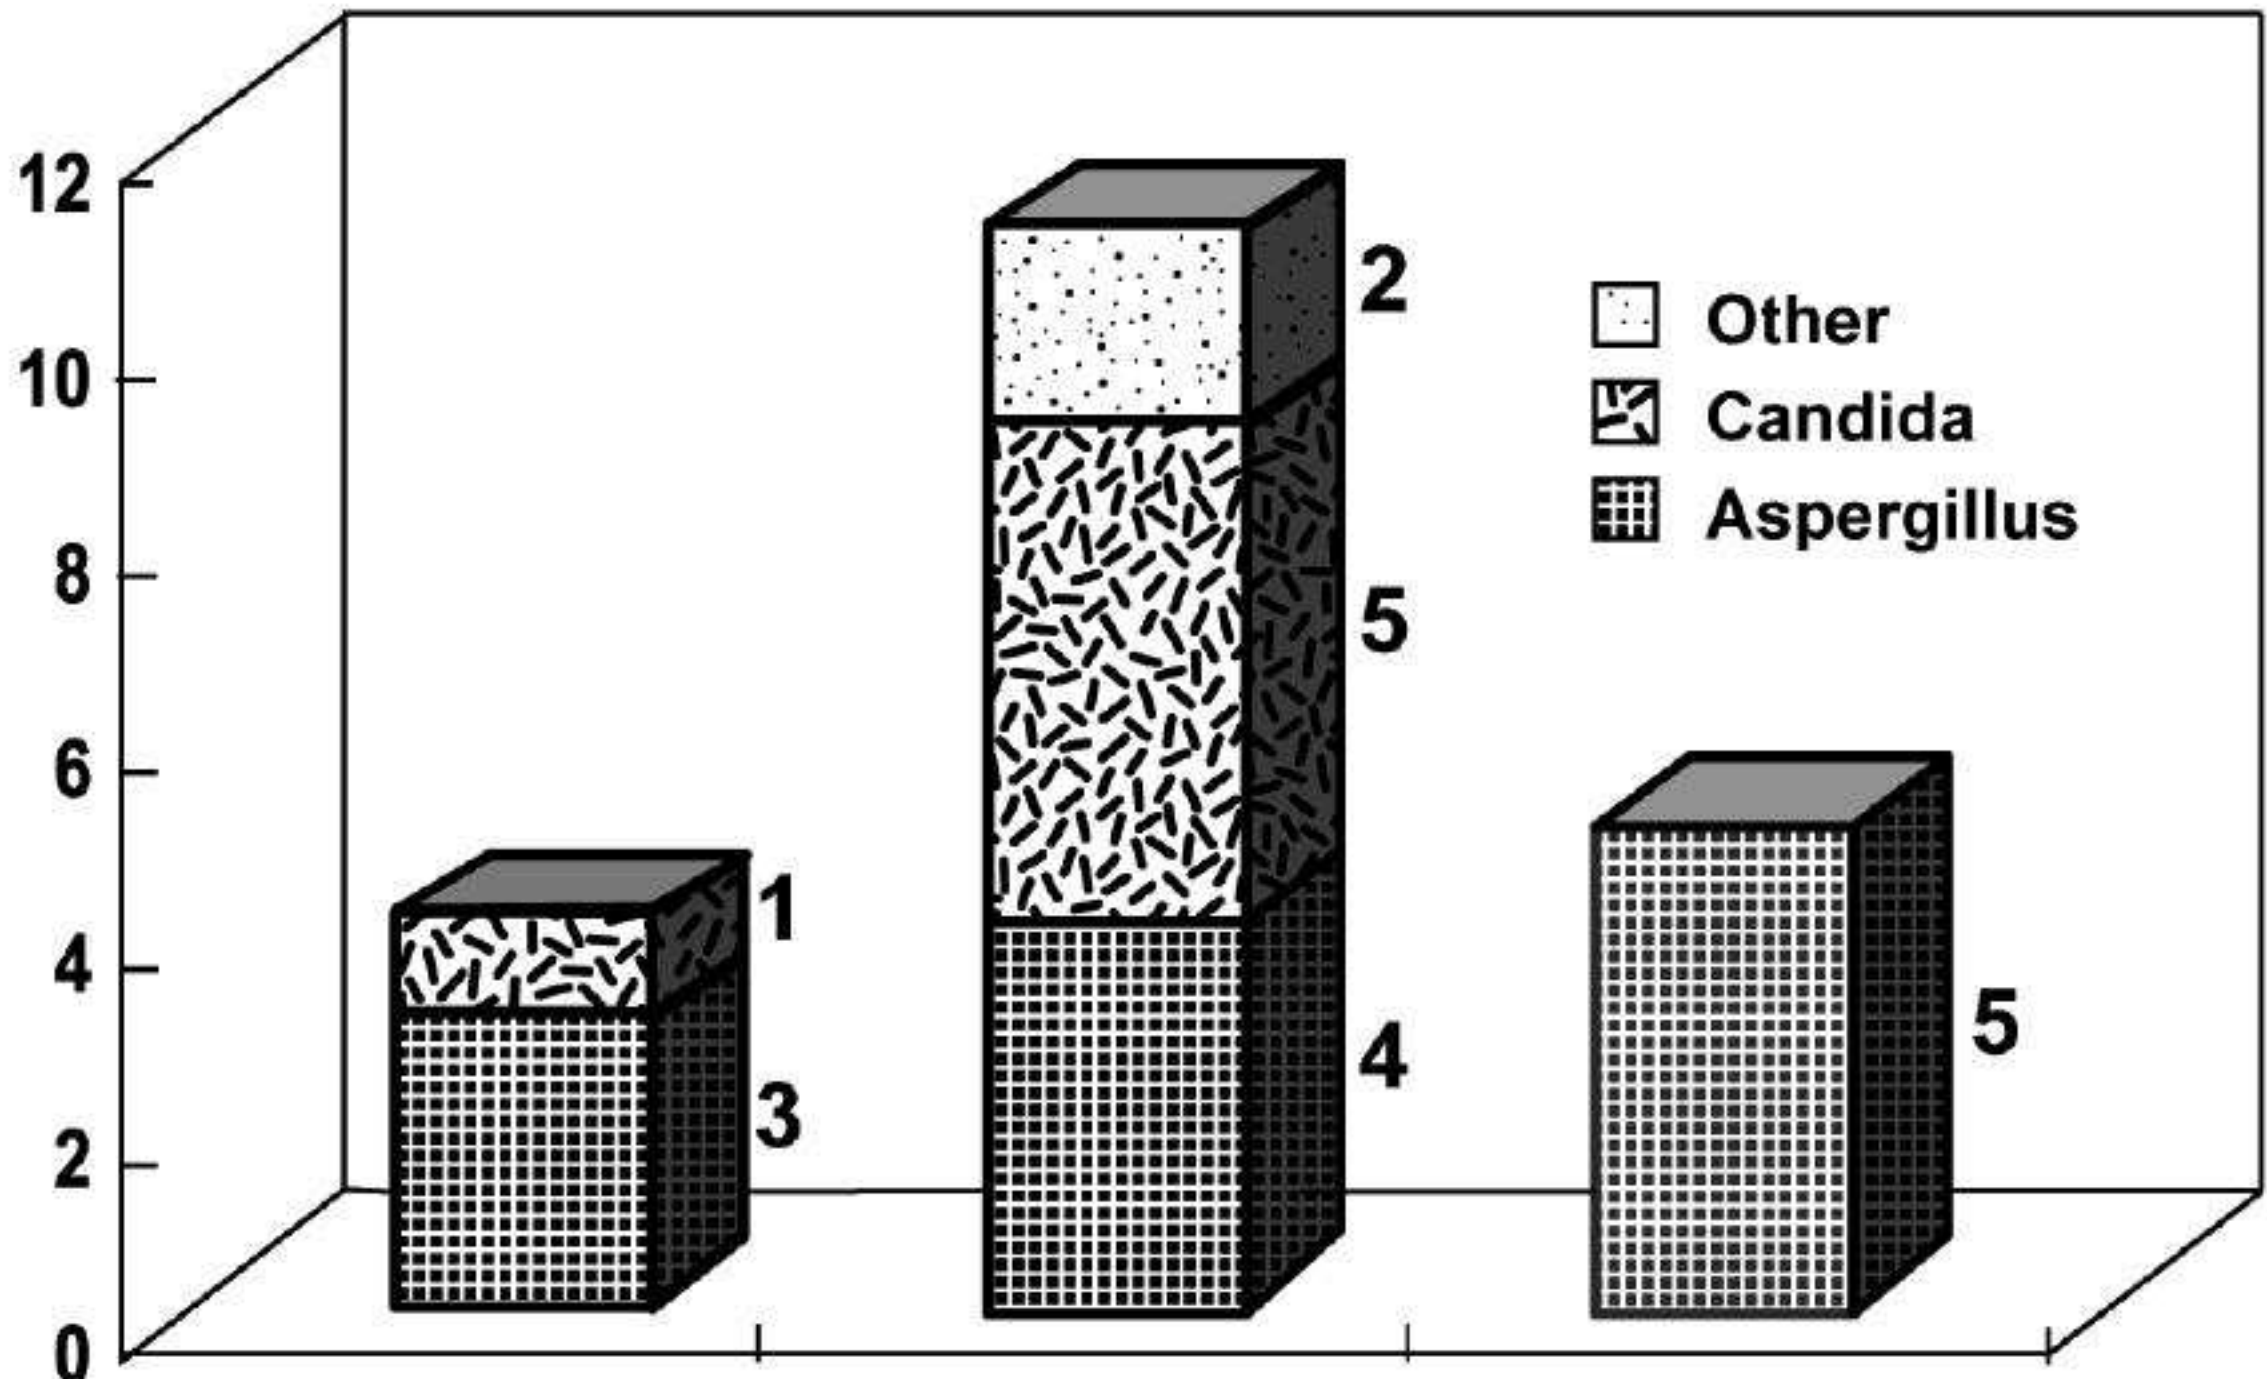

Proven

Probable

Possible

Invasive fungal infection

Supplement: MOESM1 [file 9443910]
